# Supplementary material for: The effect of mid-life insulin resistance and type 2 diabetes on older-age cognitive state: the explanatory role of early-life advantage
Source: Springer Nature journal article supplement (doi:10.1007/s00125-019-4949-3), 2019-07-29

Electronic Supplementary Material (ESM)

**ESM Fig. 1: Flow diagram of target samples for the postal questionnaire at age 68 and home visit at age 69 (amended from Kuh et al. 2017).<sup>1</sup>**

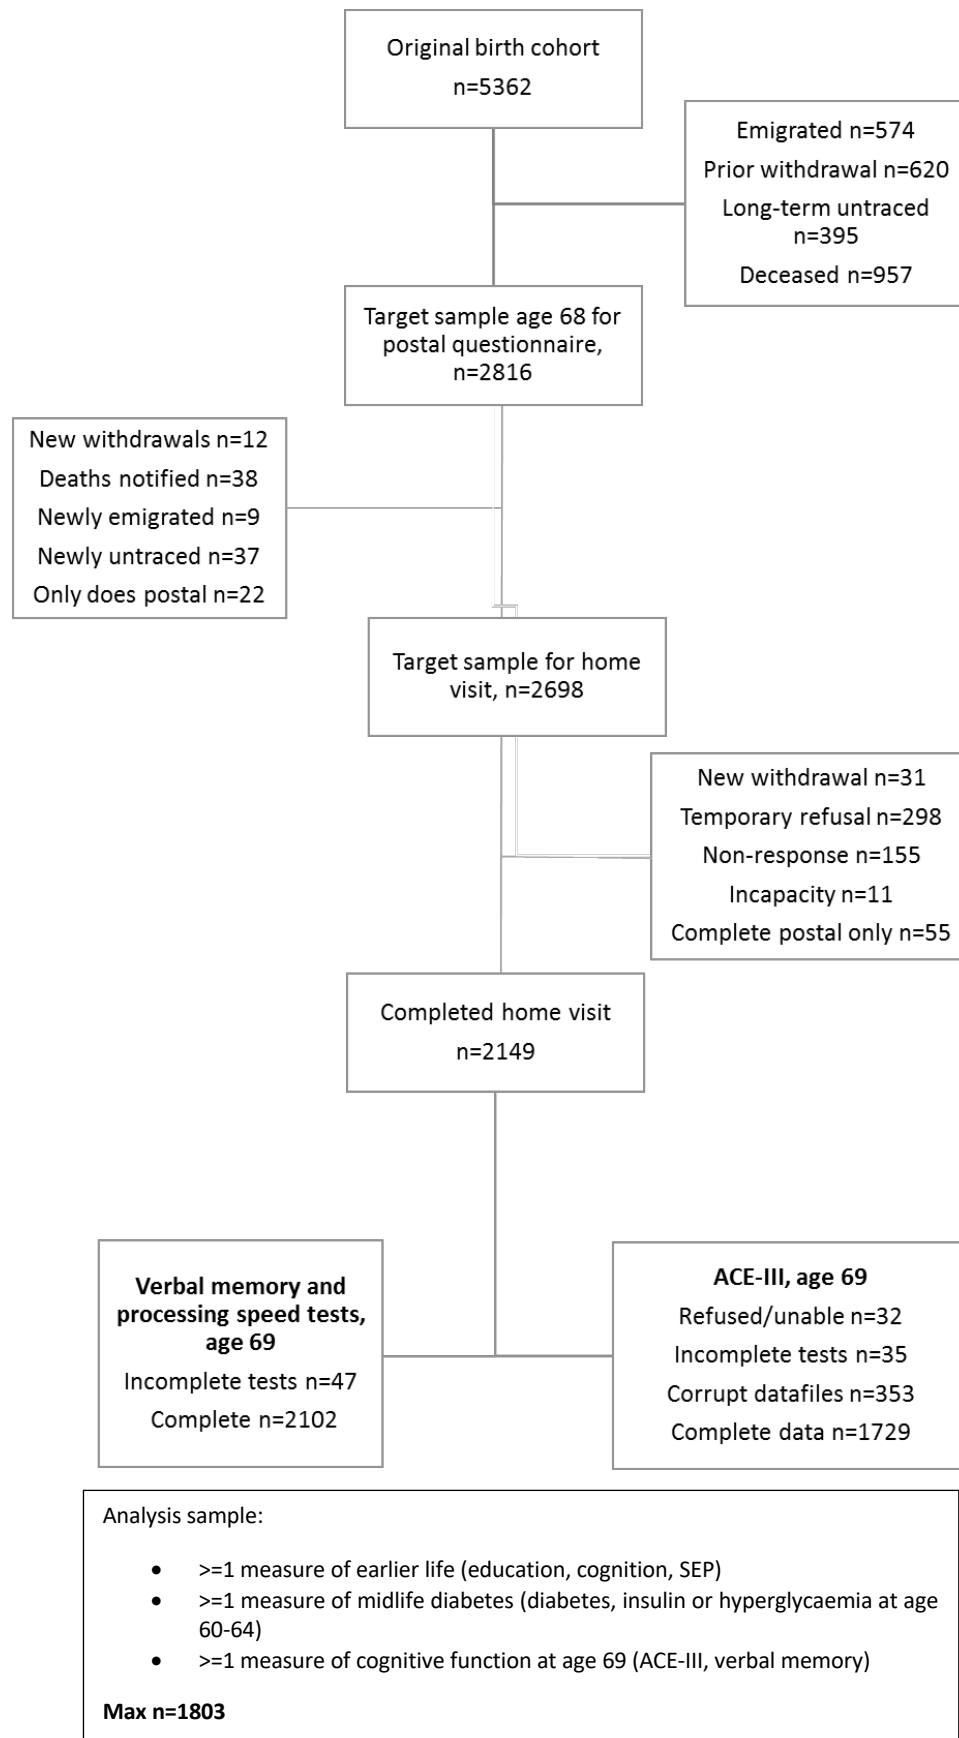

ESM Fig. 2: A) Simple path models for midlife type 2 diabetes to later-life ACE-III B) Path model for the ACE-III in relation to childhood cognition, childhood SEP, educational attainment; with midlife type 2 diabetes. All path coefficients are standardized and are mutually independent and adjusted for sex. Dashed lines represent non-significant paths at the 5% level ( $p > 0.05$ ).

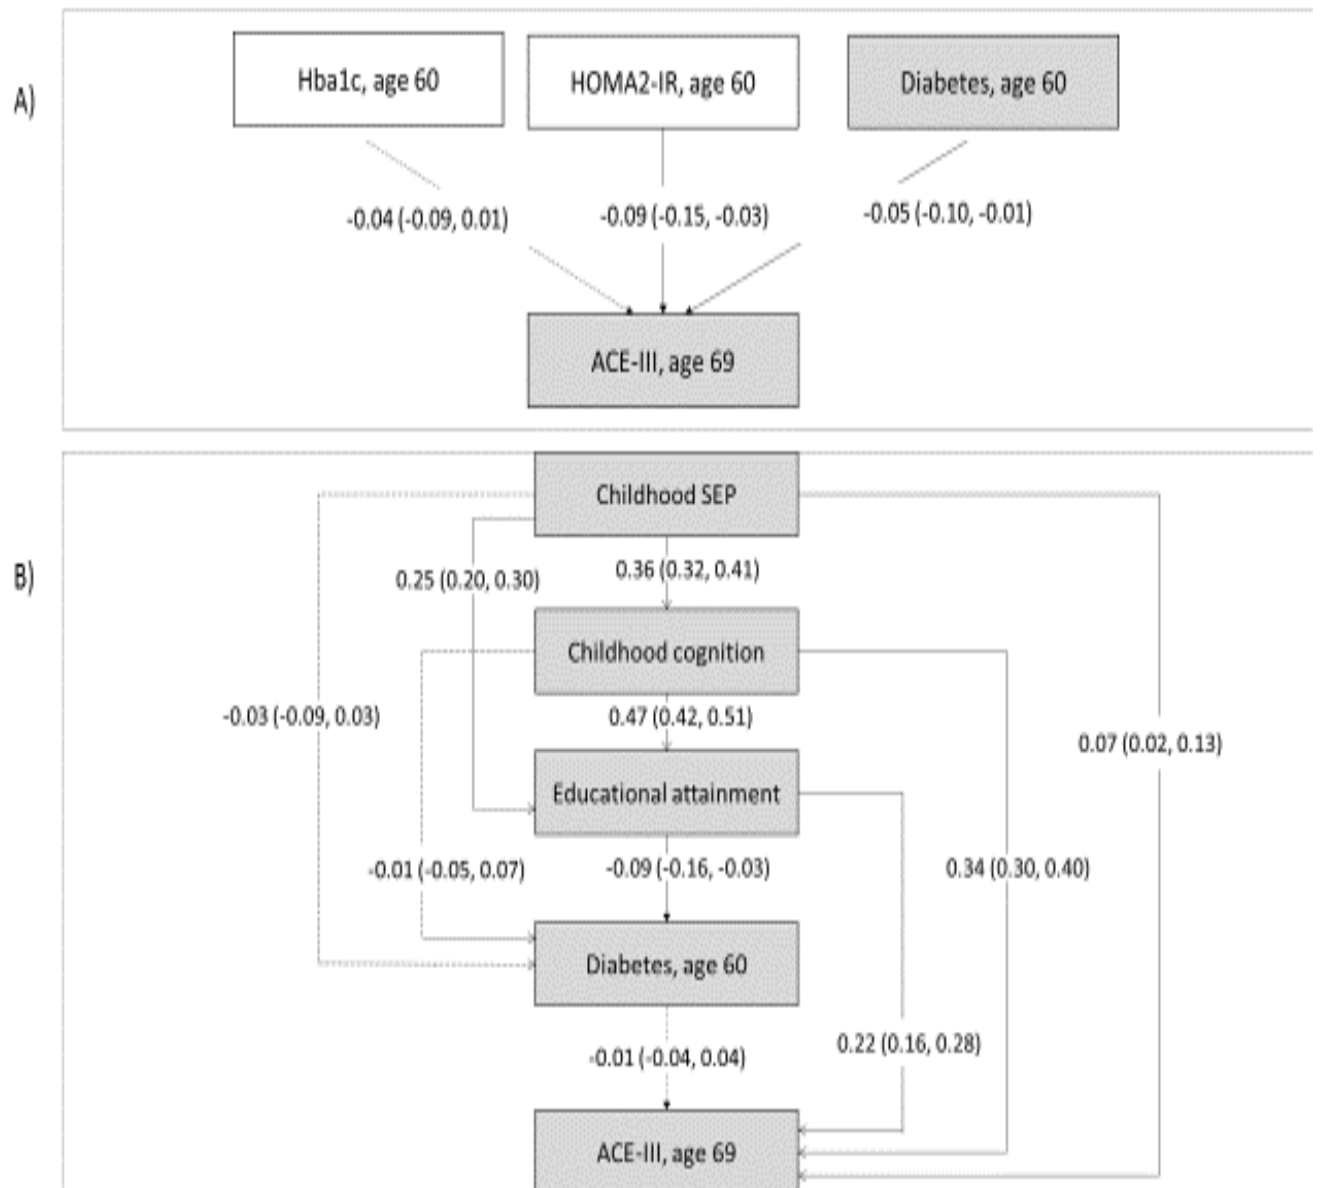

ESM Fig. 3: A) Simple path models for sex-adjusted coefficients from midlife type 2 diabetes to later-life word learning test (WLT, memory) B) Path model for the WLT in relation to childhood cognition, childhood SEP, educational attainment; with midlife type 2 diabetes. All path coefficients are standardized and are mutually independent and adjusted for sex. Dashed lines represent non-significant paths at the 5% level ( $p > 0.05$ ).

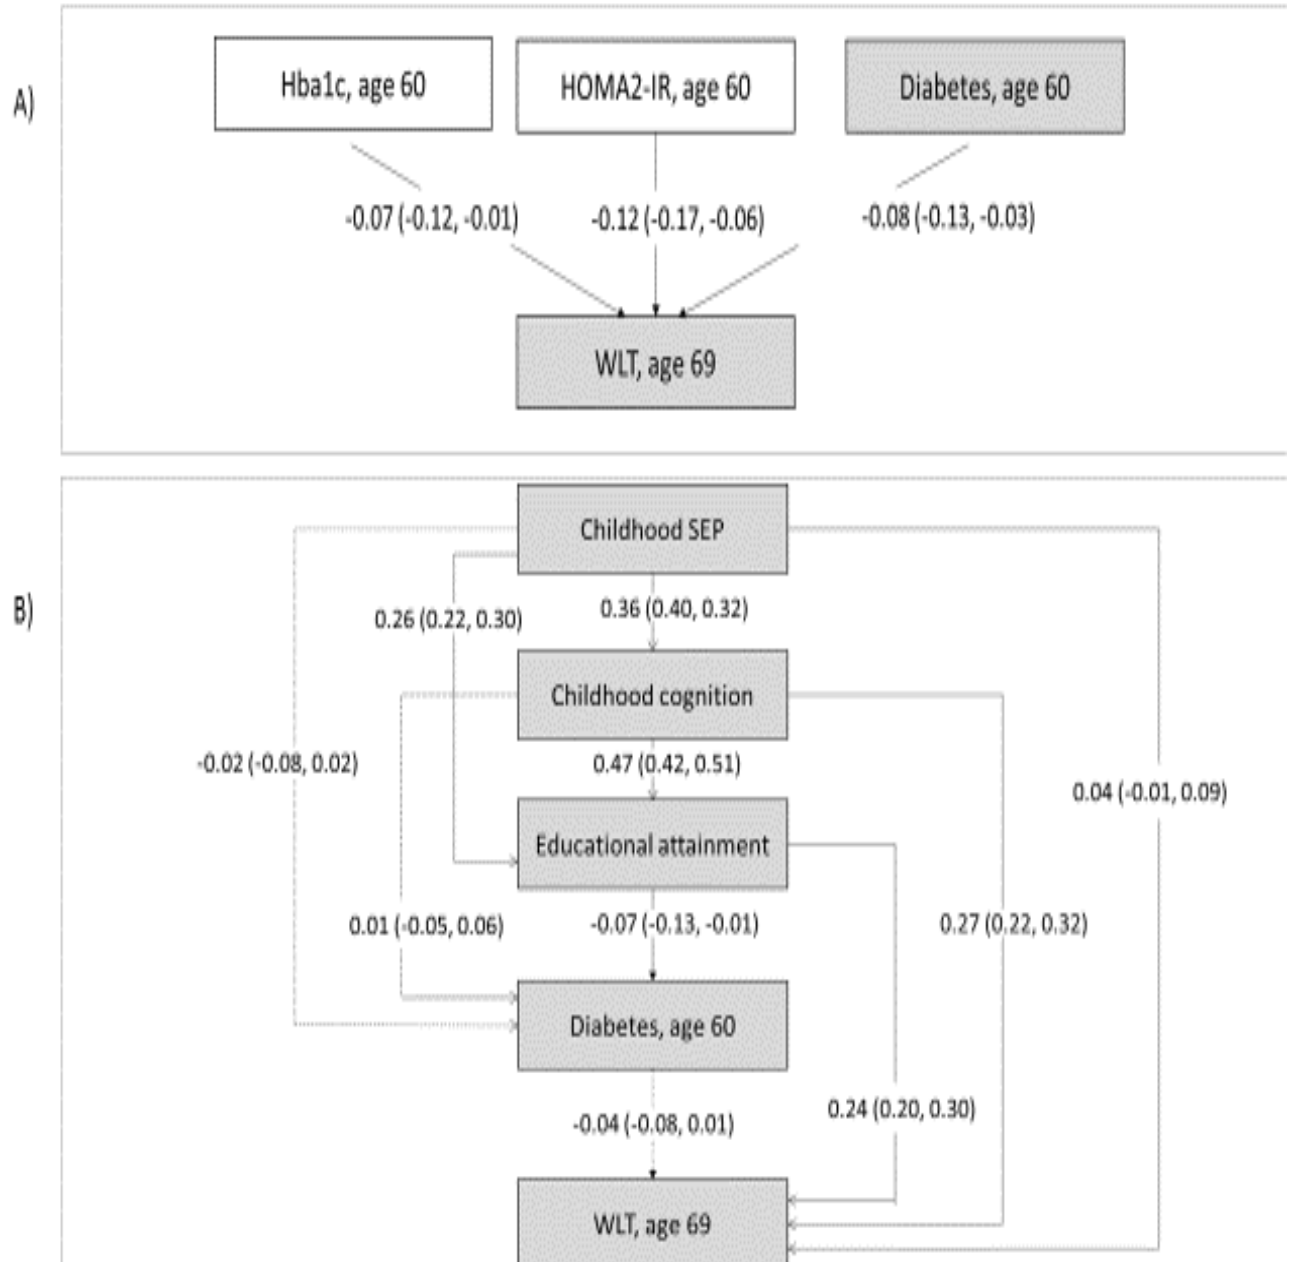

ESM Fig. 4: A) Simple path models for HOMA2-IR to later-life ACE-III (cognitive state) B) Path model for the ACE-III in relation to childhood cognition, childhood SEP, educational attainment; with midlife HOMA2-IR. All path coefficients are standardized and are mutually independent and adjusted for sex and medication use. Dashed lines represent non-significant paths at the 5% level ( $p > 0.05$ ).

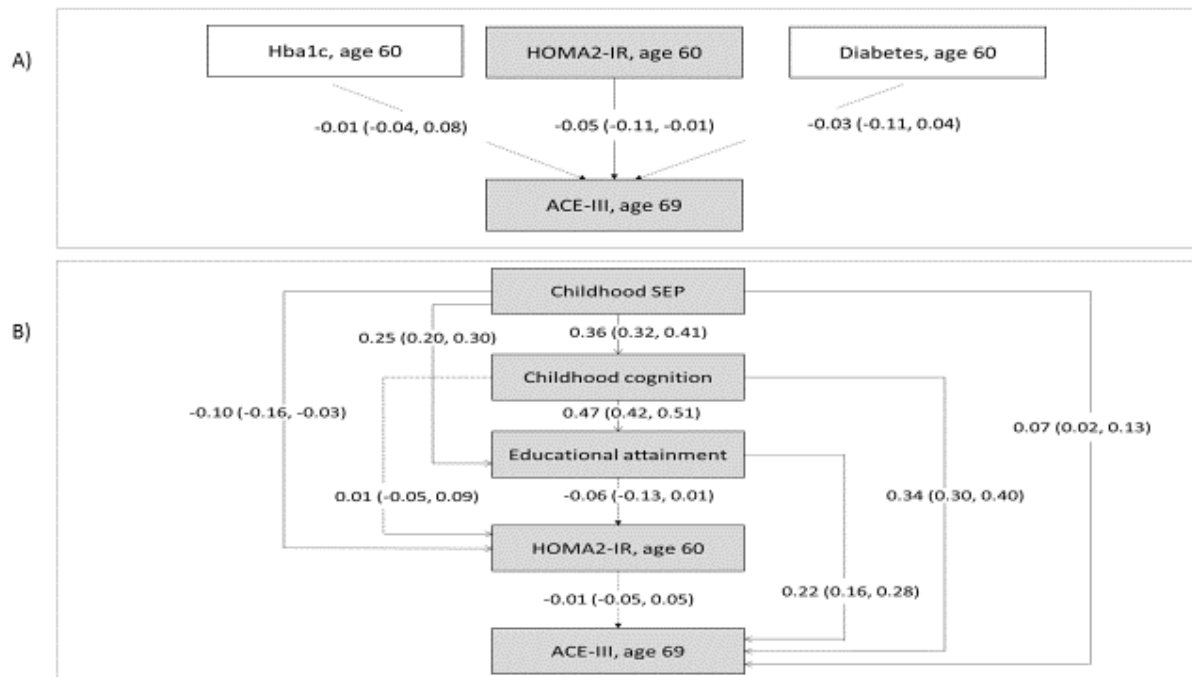

ESM Fig. 5: A) Simple path models for HOMA2-IR to later-life ACE-III (cognitive state) B) Path model for the ACE-III in relation to childhood cognition, childhood SEP, educational attainment; with midlife HOMA2-IR. All path coefficients are standardized and are mutually independent and adjusted for sex and excluding those with ACE-III scores <82. Dashed lines represent non-significant paths at the 5% level ( $p > 0.05$ ).

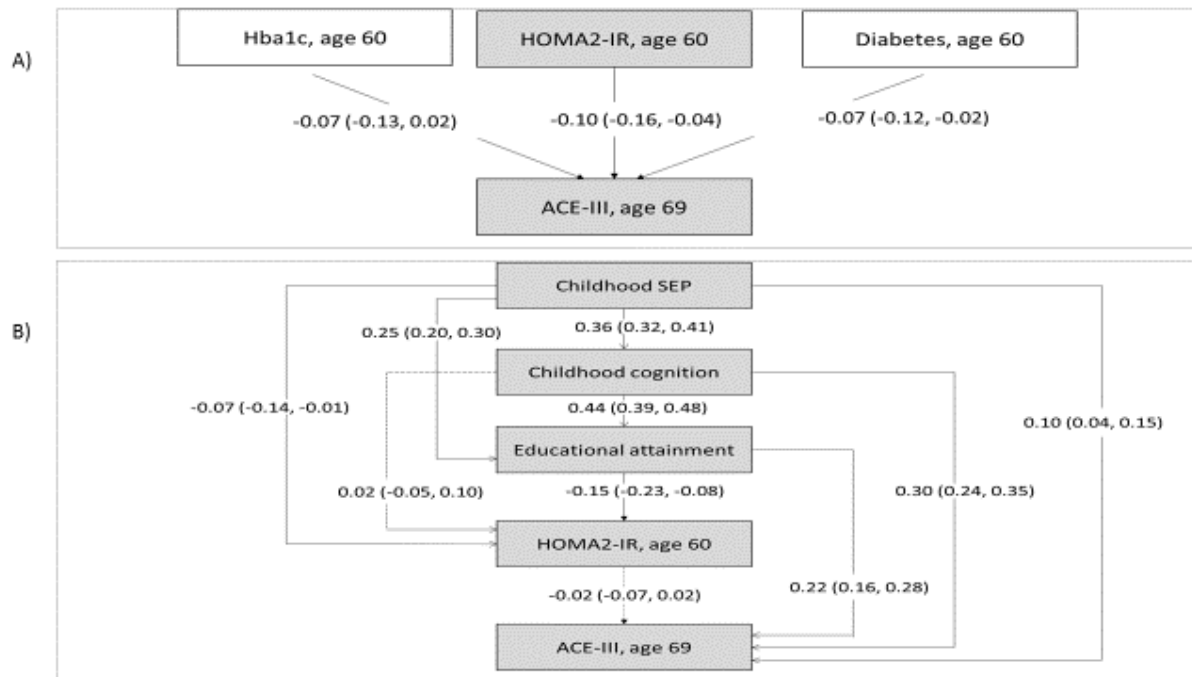

ESM Fig. 6: A) Simple path models for HOMA2-IR to later-life ACE-III (cognitive state) B) Path model for the ACE-III in relation to childhood cognition, childhood SEP, educational attainment; with midlife HOMA2-IR. All path coefficients are standardized and are mutually independent and adjusted for sex and duration of type 2 diabetes. Dashed lines represent non-significant paths at the 5% level ( $p > 0.05$ ).

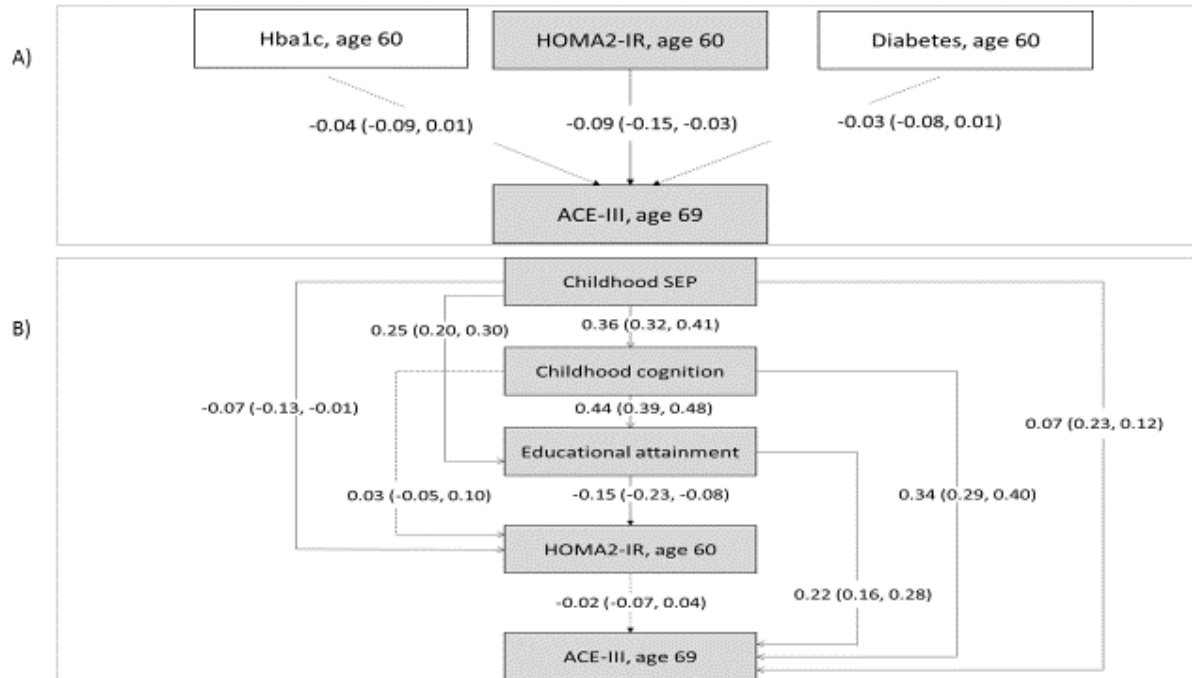

Supplement: MOESM1 [file 17019120]
